# Supplementary material for: METTL3 is essential for postnatal development of brown adipose tissue and energy expenditure in mice
Source: PubMed Central journal article supplement (PMC7125133; doi:10.1038/s41467-020-15488-2), 2020-04-03
Supplement: 41467_2020_15488_MOESM1_ESM.pdf [file 41467_2020_15488_MOESM1_ESM.pdf]

**METTL3 is essential for postnatal development of brown adipose tissue and energy expenditure in mice**

**Wang et al.**

# Supplementary Figure 1

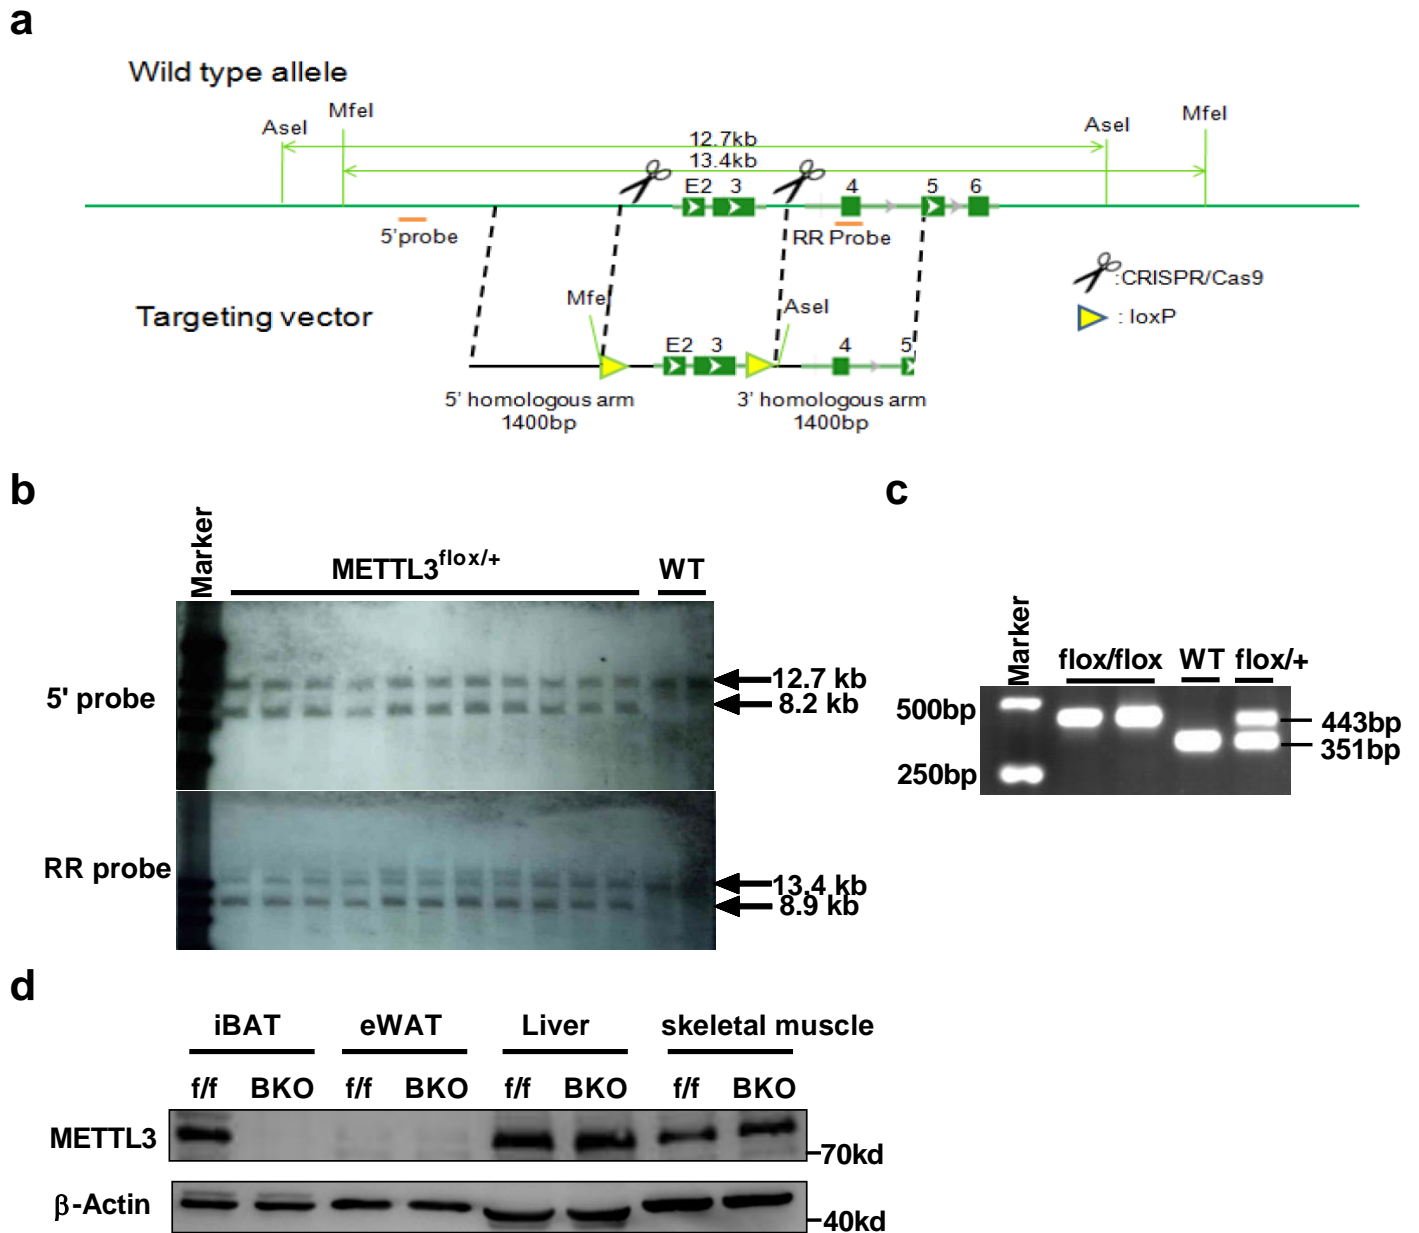

**Supplementary Figure 1. Generation of *Mettl3*<sup>flox/flox</sup> and *Mettl3* BKO mice.**

(a) *Mettl3* alleles and targeting construct. Top: wildtype *Mettl3* allele (exons indicated as solid green rectangles). Two flanking DNA fragments used for Southern hybridization are shown in red. Middle: targeting vector containing two loxP sites (yellow triangles). Insertion of the targeting vector by CRISPR/Cas9 technique yielded the *Mettl3* lox allele. (b) Southern blot of tail genome DNA from *Mettl3*<sup>flox/+</sup> (heterozygous) and WT mice. (c) Genotyping of PCR products of *Mettl3*<sup>flox/flox</sup> (homozygous), *Mettl3*<sup>flox/+</sup> (heterozygous) and WT mice. (d)

METTL3 protein levels in iBAT, eWAT, liver and skeletal muscle of 8-week-old *Mettl3<sup>flox/flox</sup>* and BKO mice.

These experiments were repeated at least three times independently with similar results.

Source data are provided as a Source Data file.

## Supplementary Figure 2

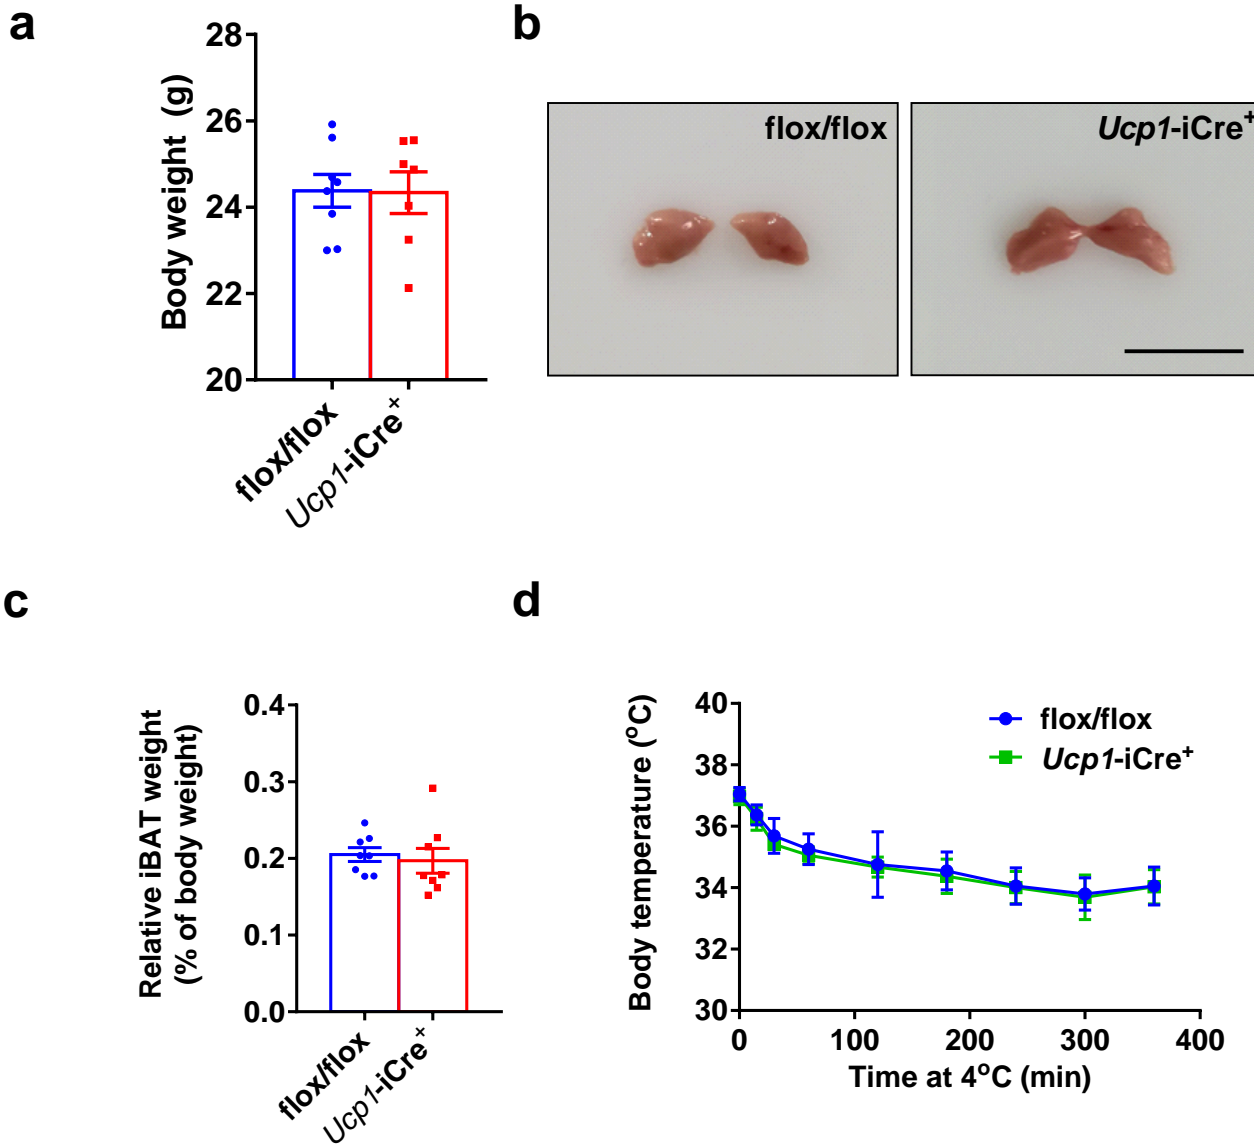

Supplementary Figure 2. *Mettl3<sup>flox/flox</sup>* mice display similar body weight, similar size of iBAT and similar cold tolerance with *Ucp1-iCre* mice.

- (a) The body weight of 8-week-old *Mettl3*<sup>fl<sup>ox</sup>/fl<sup>ox</sup></sup> and *Ucp1*-iCre mice (*Mettl3*<sup>fl<sup>ox</sup>/fl<sup>ox</sup></sup>, n = 8; *Ucp1*-iCre, n = 7).
- (b, c) Gross appearance and relative weight of iBAT in *Mettl3*<sup>fl<sup>ox</sup>/fl<sup>ox</sup></sup> and *Ucp1*-iCre mice at 8-week old (n=8 for each group). The scale bar represents 1 cm.
- (d) The rectal temperature of 8-week-old *Mettl3*<sup>fl<sup>ox</sup>/fl<sup>ox</sup></sup> and *Ucp1*-iCre mice during acute cold exposure (4°C) (n=7 for each group).

Data represent the mean ± SEM. Source data are provided as a Source Data file.

## Supplementary Figure 3

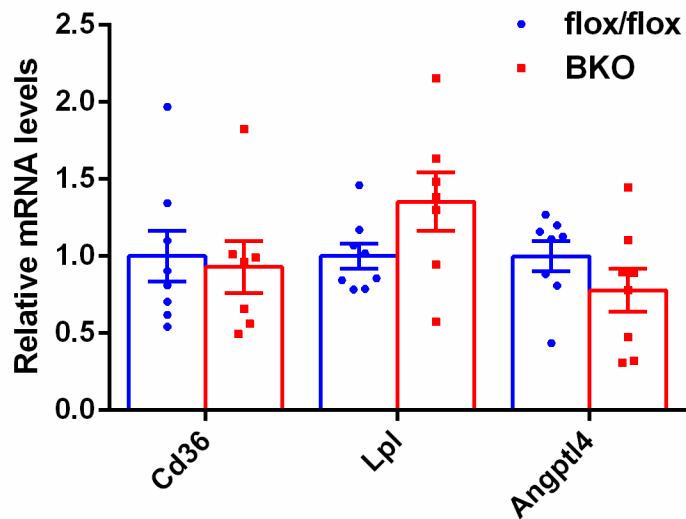

**Supplementary Figure 3. BAT-specific deletion of *Mettl3* does not affect the expression of lipid uptake associated genes in iBAT.**

Relative *Cd36*, *Lpl* and *Angptl4* mRNA levels were measured by qPCR assays in iBAT of 8-week-old *Mettl3*<sup>fl<sup>ox</sup>/fl<sup>ox</sup></sup> and BKO mice (*Cd36*, *Lpl* in BKO, n = 7; Others, n=8 for each group).

Data represent the mean ± SEM. Source data are provided as a Source Data file.

## Supplementary Figure 4

Comparison of the abundance of m<sup>6</sup>A IP and Input  
BKO VS flox/flox

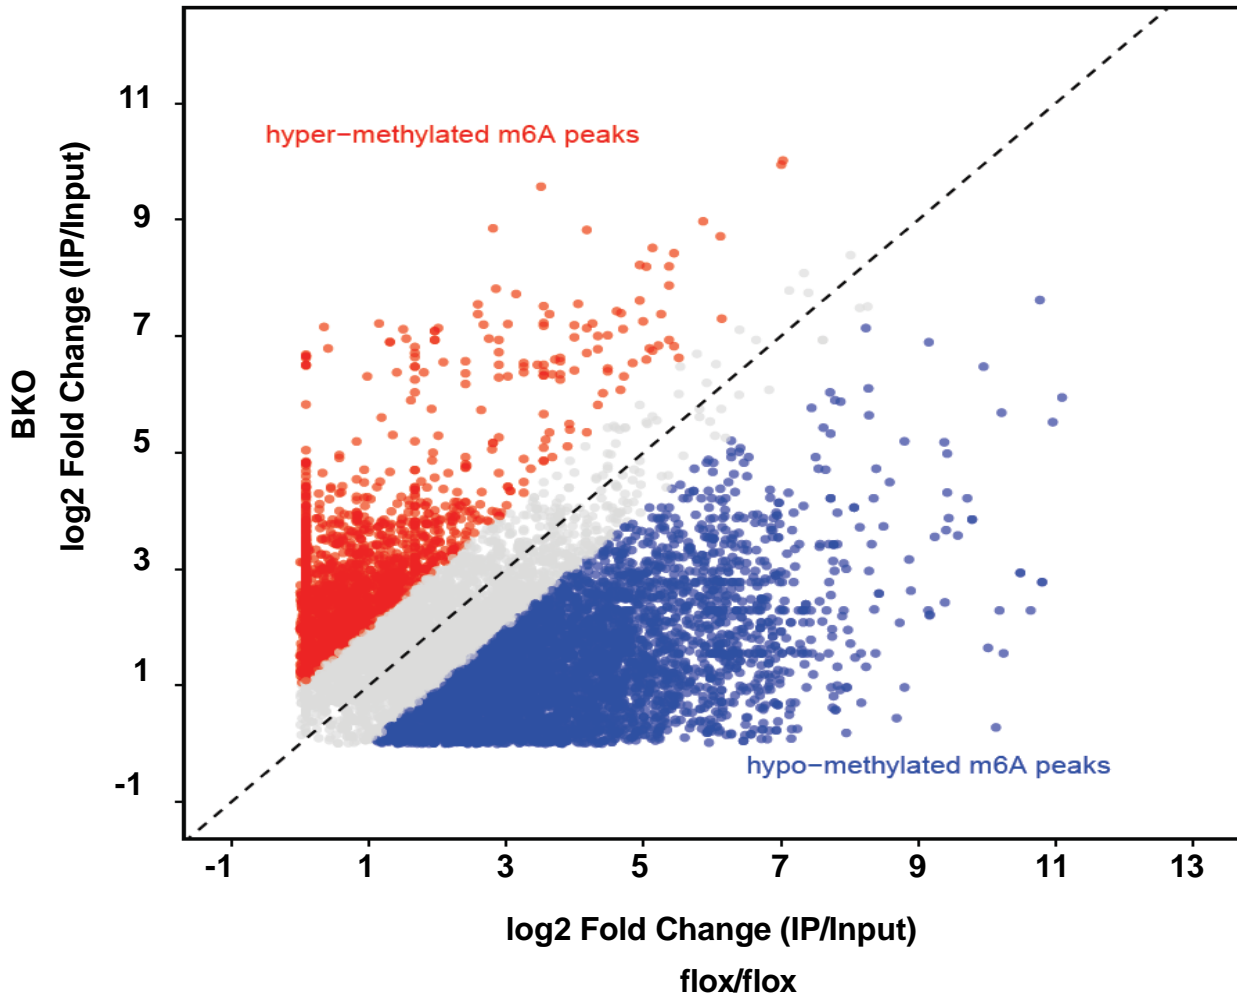

**Supplementary Figure 4. METTL3 is essential for mRNA m<sup>6</sup>A modification in iBAT.**

The m<sup>6</sup>ARIP-seq analysis of iBATs was performed in 8-week-old *Mettl3*<sup>flox/flox</sup> and BKO mice. Comparison of the abundance of m<sup>6</sup>A IP and Input mRNAs (BKO VS flox/flox).

Supplementary Figure 5

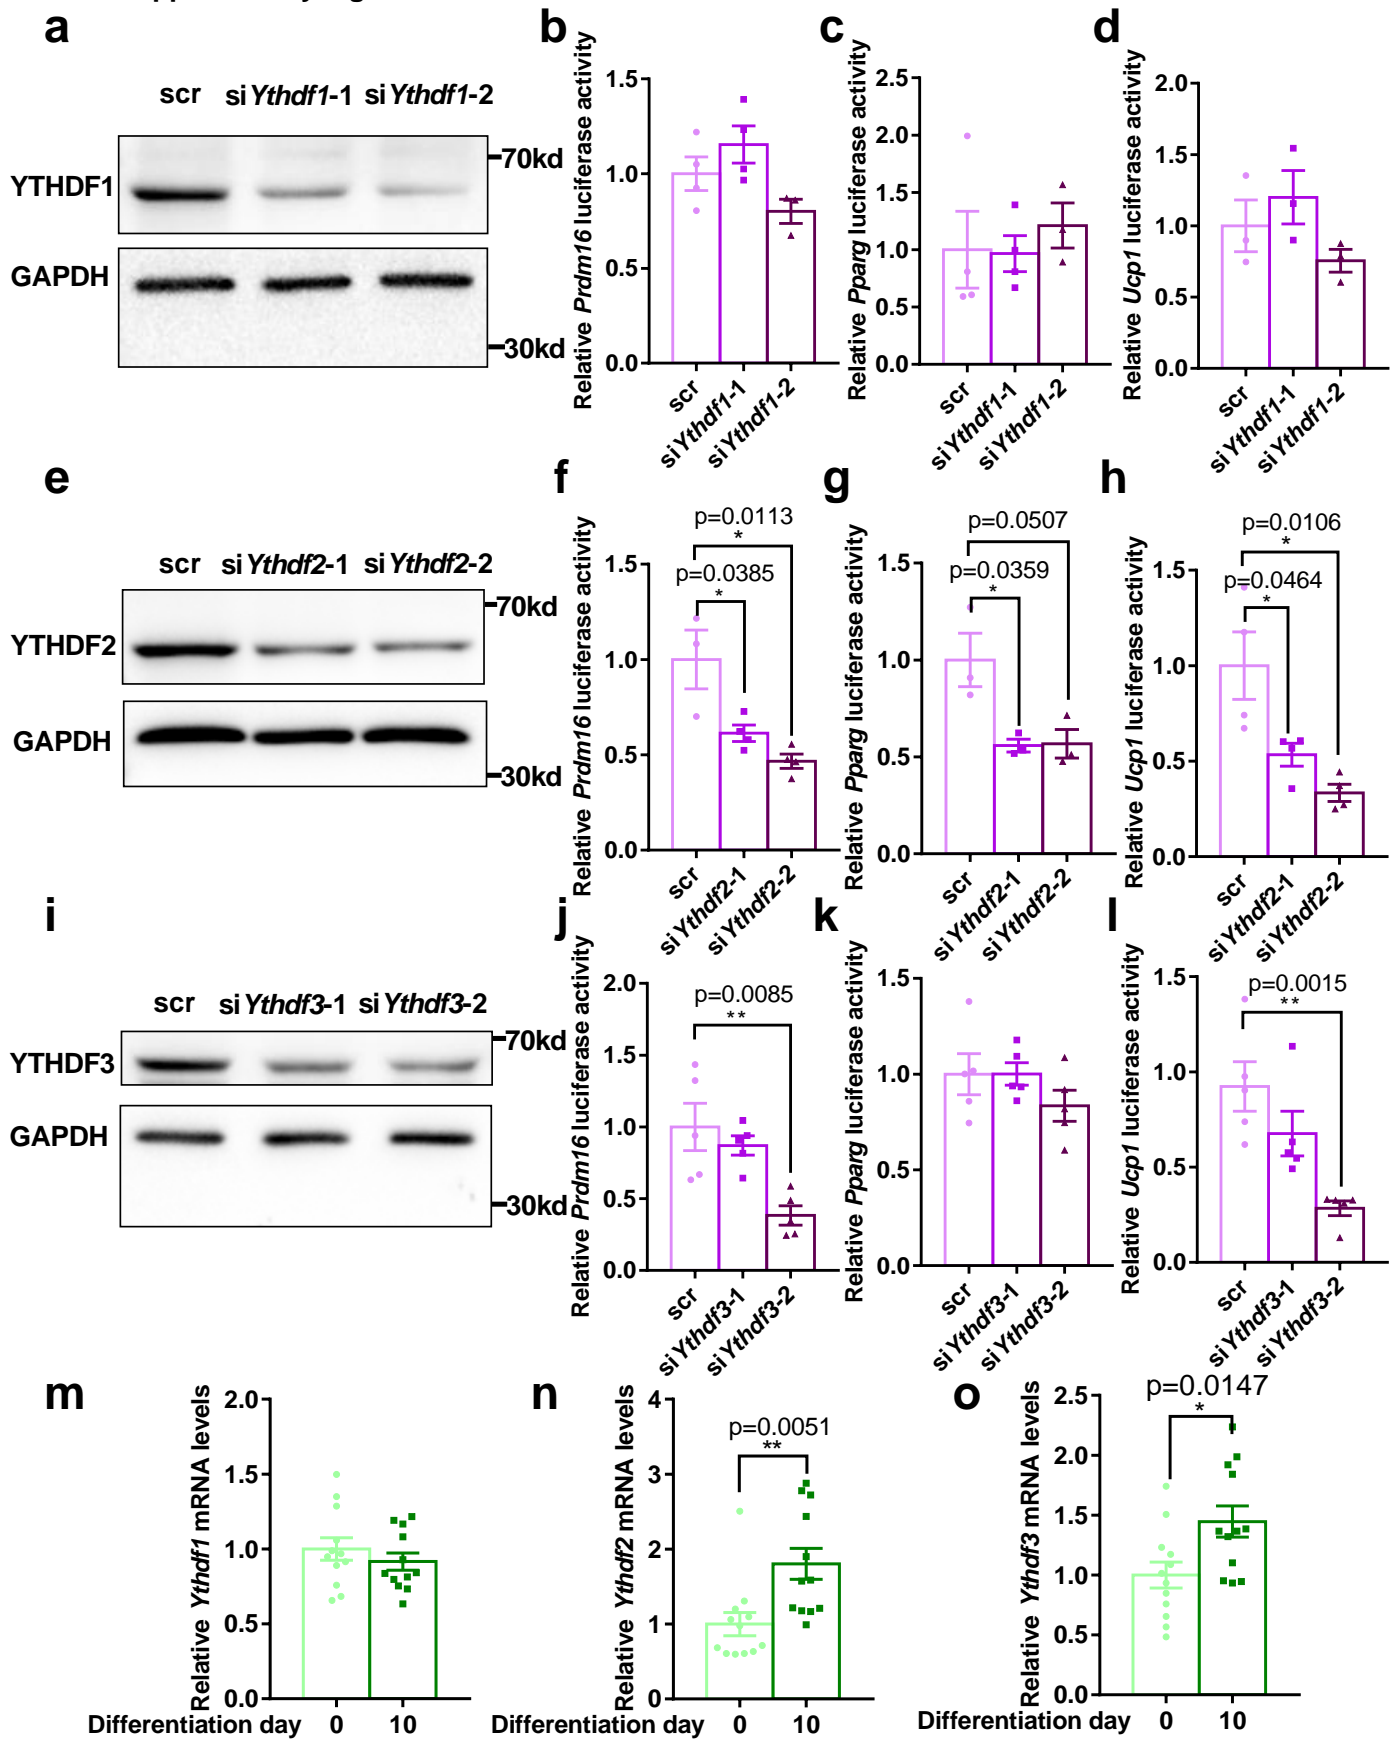

**Supplementary Figure 5. m<sup>6</sup>A reader proteins regulate *Prdm16*, *Pparg* and *Ucp1* luciferase activity.**

Primary brown preadipocytes seeded in 24-well plates were co-transfected with pMIR-REPORT Luciferase vectors (*Prdm16*, *Pparg*, *Ucp1*), siRNAs (Scramble siRNA, si*Ythdf1-1*, si*Ythdf1-2*; Scramble siRNA, si*Ythdf2-1*, si*Ythdf2-2*; or Scramble siRNA, si*Ythdf3-1*, si*Ythdf3-2*) and  $\beta$ -galactosidase ( $\beta$ -Gal) reporter plasmid by X-tremeGENE siRNA Transfection Reagent for 24 hours. Cells were then induced to differentiate for 48 hours. (a, e, i) YTHDF1-3 and GAPDH protein levels were measured by immunoblotting. (b-d, f-h, j-l) Relative *Prdm16*, *Pparg* and *Ucp1* luciferase activity were measured and normalized to  $\beta$ -Gal levels (n=3-5 for each group). (m-o) The relative *Ythdf1-3* mRNA levels in mature primary brown adipocytes (10 days after differentiation) and preadipocytes (before differentiation) (n=12 for each group).

These cell culture experiments were repeated three times independently with similar results.

Data represent the mean  $\pm$  SEM. Significance was determined by unpaired two-tailed Student's *t* test analysis.

\*, p < 0.05. \*\*, p < 0.01. Source data are provided as a Source Data file.

## Supplementary Figure 6

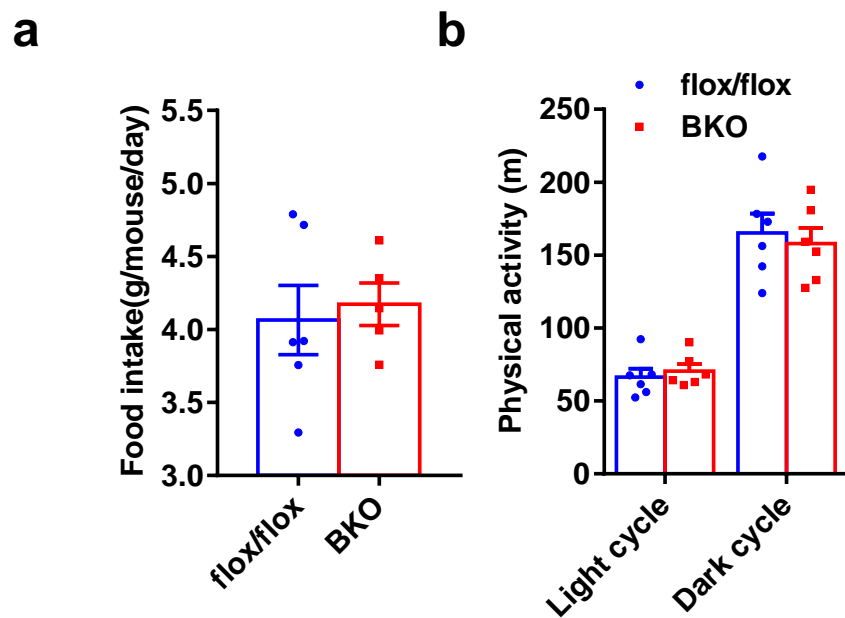

**Supplementary Figure 6. *Mettl3* deficiency in BAT does not affect food intake or physical activity.**

(a) The food intake of 8-week-old *Mettl3*<sup>flox/flox</sup> and BKO mice (*Mettl3*<sup>flox/flox</sup>, n = 6; BKO, n = 5).

(b) The physical activity of 8-week-old *Mettl3*<sup>flox/flox</sup> and BKO mice (n = 6 for each group).

Data represent the mean  $\pm$  SEM. Source data are provided as a Source Data file.



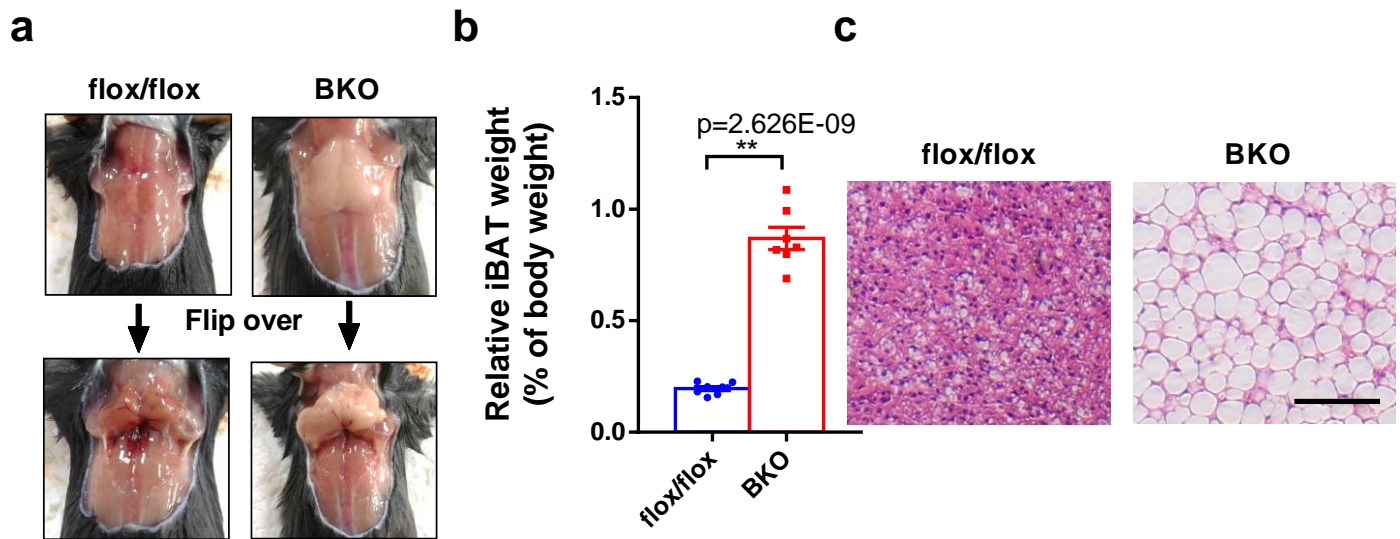

**Supplementary Figure 7. The morphology of iBAT in BKO mice under the cold exposure condition still appears abnormal, enlarged and “whitening”.**

(a, b, c) Gross appearance, relative weight, and H&E staining of iBATs in *Mettl3*<sup>flox/flox</sup> and BKO mice ( 8 weeks) after acute cold exposure (4°C) for 6 h (b: *Mettl3*<sup>flox/flox</sup>, n = 8; BKO, n = 7). The scale bar represents 100 μm. Data represent the mean ± SEM. Significance was determined by unpaired two-tailed Student's *t* test analysis. \*\*, p< 0.01. Source data are provided as a Source Data file.

## Supplementary Figure 8

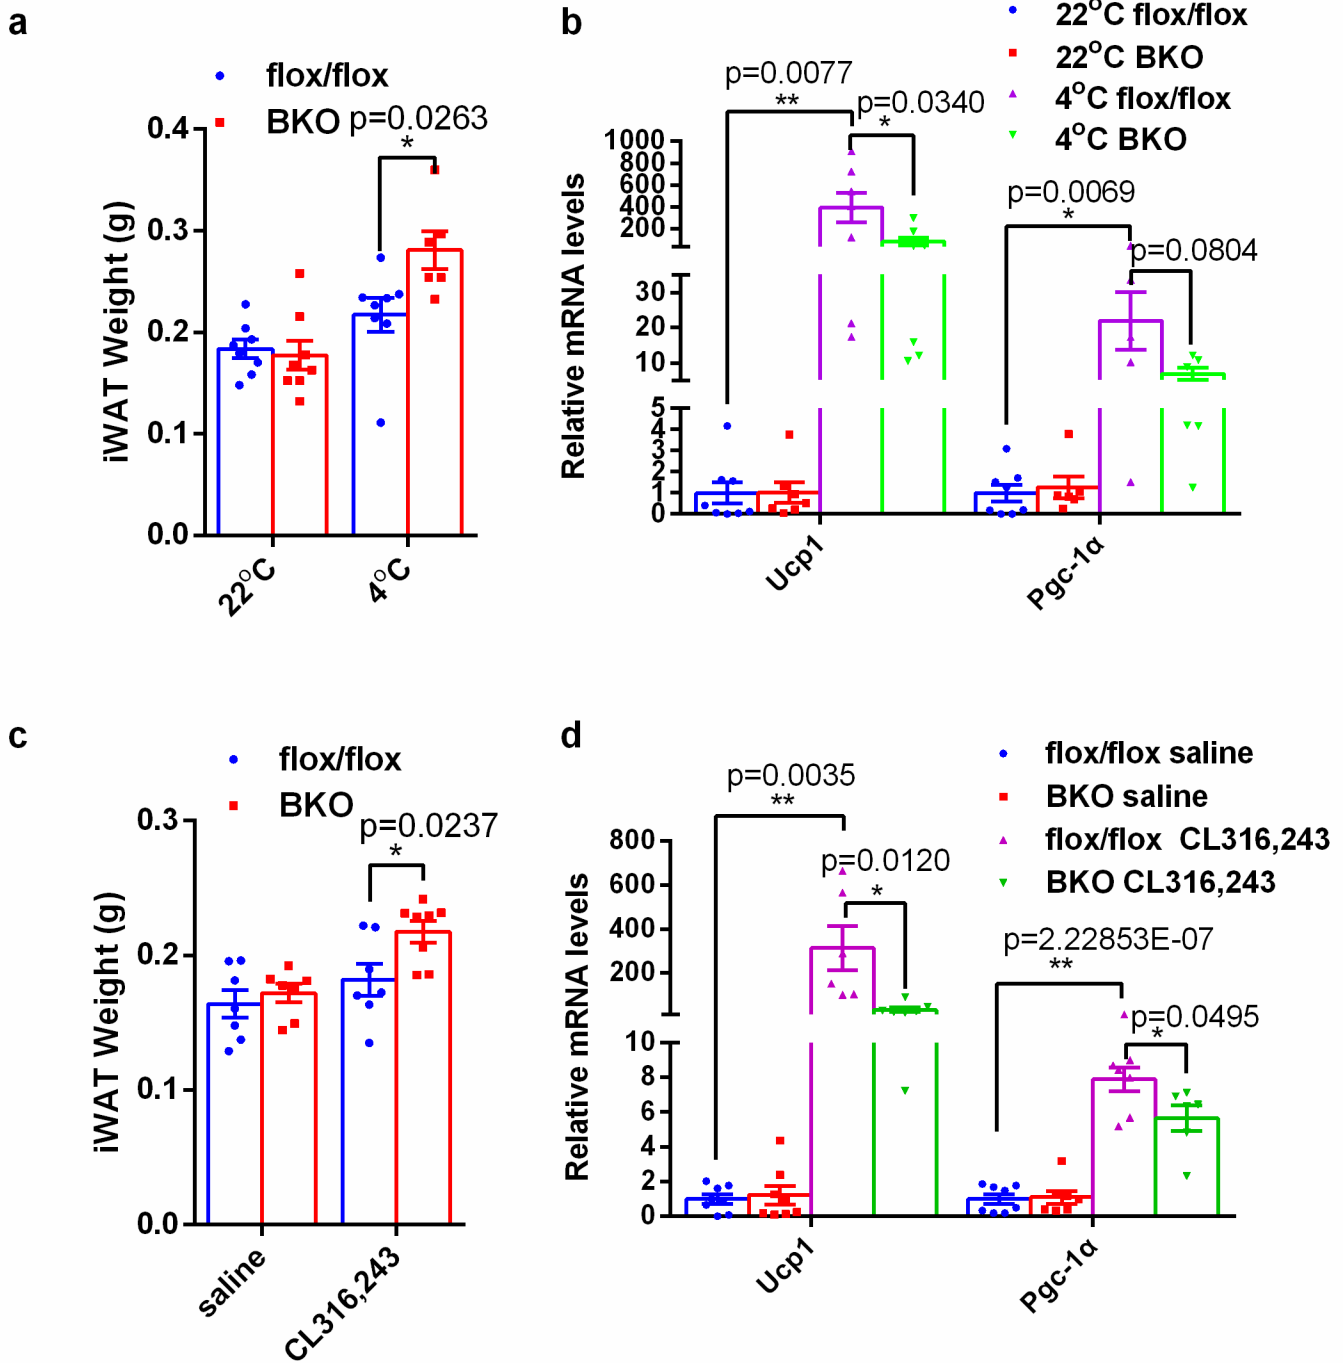

Supplementary Figure 8. BAT-specific deletion of *Mettl3* impairs the browning of WAT in response to chronic cold exposure or the  $\beta$ -adrenergic agonist.

BKO mice and flox/flox controls were exposed for chronic cold challenge (4°C 7d) or injected intraperitoneally with CL316,243 for 4 days to induce browning of WAT. (a, c) The weight of iWAT was measured in BKO and flox/flox mice (n=6-8 for each group). (b, d) The relative *Ucp1* and *Pgc-1 $\alpha$*  mRNA levels were measured by qPCR analysis in iWAT of BKO and flox/flox mice (n=5-8 for each group).

Data represent the mean  $\pm$  SEM. Significance was determined by unpaired two-tailed Student's *t* test analysis.

\*, p< 0.05.\*\*, p< 0.01. Source data are provided as a Source Data file.

**Supplementary Table 1 Primers for qPCR**

| Genes          | Forward                          | Reverse                       |
|----------------|----------------------------------|-------------------------------|
| Pparg2         | 5'-TGGGTGAAACTCTGGGAGATTC-3'     | 5'-GAGAGGTCCACAGAGCTGATTCC-3' |
| Pgc-1 $\alpha$ | 5'-TGGACGGAAGCAATTTTTCA-3'       | 5'-TTACCTGCGCAAGCTTCTCT-3'    |
| Adiponectin    | 5'-GCACTGGCAAGTTCTACTGCAA-3'     | 5'-GTAGGTGAAGAGAACGGCCTTGT-3' |
| Prdm16         | 5'-CAGCACGGTGAAGCCATTC-3'        | 5'-GCGTGCATCCGCTTGTG-3'       |
| Cebpb          | 5'-TTATAAACCTCCCCTCGGC-3'        | 5'-TTCCATGGGTCTAAAGGCGG-3'    |
| Ucp1           | 5'-TGGAAAGGGACGACCCCTAA-3'       | 5'-CAGGAGTGTGGTGCAAAACC-3'    |
| Adrb3          | 5'-CTATGCCAACTCCGCCTTCA-3'       | 5'-GCCATCAAACCTGTTGAGCG-3'    |
| Ndufa8         | 5'-GAGTTTATGCTGTGCCGCTG -3'      | 5'-TACTCTGTGAAAGGCTCCGC-3'    |
| Uqcrg          | 5'-TTCAGCAAAGGCATCCCCAA-3'       | 5'-CGACTGCTCAAACCTCCTGGT-3'   |
| Sdhb           | 5'-GACGTCAGGAGCCAAAATGG-3'       | 5'-CTCGACAGGCCTGAAACTGC-3'    |
| Glut4          | 5'-TCTCCAACCTGGACCTGTAAC-3'      | 5'-TCTGTACTGGGTTTCACCTC-3'    |
| Cox5b          | 5'-AGAAGGGACTGGACCCATACA -3'     | 5'-CCTTTGTGCAGCCAAAACCA-3'    |
| Cebpa          | 5'-CAAGAACAGCAACGAGTACCG-3'      | 5'-GTCACTGGTCAACTCCAGCAC-3'   |
| Cox6b1         | 5'-AACTACCTGGACTTCCACCG-3'       | 5'-GGTACCACTCACACACGGAG-3'    |
| Acta1          | 5'-CGACGGGCAGGTCATCA-3'          | 5'-ACCGATAAAGGAAGGCTGGAA-3'   |
| Myoglobin      | 5'-CATGGACAGGAAGTCCTCATCG-3'     | 5'-CTGTGAGCACGGTGCAACCATG-3'  |
| MHC-1 $\beta$  | 5'-GAGGAAGAGTGAGCGGCG-3'         | 5'-GCCGCAGTAGGTTCTTCTGT-3'    |
| MHC-IIa        | 5'-TACAACCTCAAAGAGCGTTATGCA-3'   | 5'-AAGGGTTGACGGTGACACAGA-3'   |
| MEF2c          | 5'-GAGCGTGCTGTGCGACTGT-3'        | 5'-CGTGCGGCTCGTTGTACTC-3'     |
| Casq2          | 5'-ACATCAAAGACCCACCCTACGT-3'     | 5'-CGATGTGGATCCCATTCAAGT-3'   |
| Tnnc1          | 5'-CCTGTGGTGCCTCCTTTGATT-3'      | 5'-TGCGGTCTTTTAGTGCAATGAG-3'  |
| ATGL           | 5'-GAGGAATGGCCTACTGAACCAA-3'     | 5'-AGGCTGCAATTGATCCTCCTC-3'   |
| Fasn           | 5'-TTGACGGCTCACACACCTAC-3'       | 5'-CGATCTTCCAGGCTCTTCAG-3'    |
| Srebp1         | 5'-AACGTCACTTCCAGCTAGAC-3'       | 5'-CCACTAAGGTGCCTACAGAGC-3'   |
| Cidea          | 5'-ATCACAACCTGGCCTGGTTACG-3'     | 5'-TACTACCCGGTGTCCATTTCT-3'   |
| Cpt1b          | 5'-CATGTATCGCCGCAAACCTGG-3'      | 5'-GGTGCTGTAGCAAGTCTGTCT-3'   |
| Cox6a          | 5'-GAGGGTTCAGCTCGGATGTG-3'       | 5'-GGTCTCTCGTGCTCTTCGTG-3'    |
| Cox6b1         | 5'-AACTACCTGGACTTCCACCG-3'       | 5'-GGTACCACTCACACACGGAG-3'    |
| Cox7a1         | 5'-TCTTCCAGGCCGACAATGAC-3'       | 5'-GCCAGCCCAAGCAGTATAA-3'     |
| nLPL           | 5'-GGATGGACGGTAAGAGTGATTC-3'     | 5'-ATCCAAGGGTAGCAGACAGGT-3'   |
| mtND1          | 5'-GTGGCTCATCTACTCCACTGA-3'      | 5'-TCGAGCGATCCATAACAATAA-3'   |
| Pfkm           | 5'-GGCGGAGGAGAGCTAAAAC -3'       | 5'-CCCTGACGGCAGCATTCATA-3'    |
| Cpt2           | 5'-CAAAGACTCATCCGCTTTGTTTC-3'    | 5'-CATCACGACTGGGTTTGGGTA-3'   |
| MG2            | 5'-GCTGTGGCGGTAGTGGAA-3'         | 5'-ATGAGGGCCTTGGGTGTG -3'     |
| HSL            | 5'-GTGGTGTGTAACCTAGGATTGACTCT-3' | 5'-GAACGCTGAGGCTTTGATCTTG-3'  |
| aP2            | 5'-AAGGAAAGTGGCAGGCATGG-3'       | 5'-CACGCCAGTTTGAAGGAAATC-3'   |

|            |                                 |                                 |
|------------|---------------------------------|---------------------------------|
| 36B4       | 5'-AAGCGCGTCCTGGCATTGTCT-3'     | 5'-CCGCAGGGGCAGCAGTGGT-3'       |
| Prdm16-m6A | 5'-AAAAGGACCCAGGTAGCCCT-3'      | 5'-GGACCCGTGTCCCAACTATC-3'      |
| PPARg-m6A  | 5'-GACAGACCTCAGGCAGATCG -3'     | 5'-AAGGAACACGTTGTCAGCGG-3'      |
| UCP1-m6A   | 5'-CAGGACGGTGCCCTGTATTT-3'      | 5'-TCGTGGTCTCCAGCATAGA-3'       |
| Lpl        | 5'-AGAAGGGAAAGGACTCAGCAG-3'     | 5'-TCAAACACCCAAACAAGGGTA-3'     |
| Angptl4    | 5'-ACTTCAGATGGAGGCTGGAC-3'      | 5'-TCCGAAGCCATCCTTGTAGG-3'      |
| Cd36       | 5'-GGAGTGGTGATGTTTGTGCT-3'      | 5'-GCACACACCACCATTTCTTCT-3'     |
| Ythdf1     | 5'-CTGCAGTTAAGACGGTGGGT-3'      | 5'-TAGCAATGGCTGCCCATGAA-3'      |
| Ythdf2     | 5'-AGCCAATGAGGAAAGGGCATT-3'     | 5'-CTCCCAAACACAGAGACTCAA-3'     |
| Ythdf3     | 5'-TGTTCTATCTTGATTTGACTTTGCT-3' | 5'-ATAGCTGTTATTCTGATTTGTCTGG-3' |
